# Supplementary material for: Dual Targeting of Endothelial and Cancer Cells Potentiates In Vitro Nanobody-Targeted Photodynamic Therapy
Source: MDPI journal article supplement (doi:10.3390/cancers12102732), 2020-09-23
Supplement: s1 [file s1]

# Dual targeting of endothelial and cancer cells potentiates *in vitro* nanobody-targeted photodynamic therapy

Vida Mashayekhi<sup>1</sup>, Katerina T. Xenaki<sup>1</sup>, Paul van Bergen en Henegouwen<sup>1</sup>, Sabrina Oliveira<sup>1,2,\*</sup>

<sup>1</sup> Cell Biology, Neurobiology & Biophysics, Department of Biology, Faculty of Science, Utrecht University, 3584 CH, Utrecht, The Netherlands

<sup>2</sup> Pharmaceutics, Department of Pharmaceutical Sciences, Faculty of Science, Utrecht University, 3584 CG Utrecht, The Netherlands

\* Correspondence: s.oliveira@uu.nl; Tel.: +31 634103460

## Supplementary Data

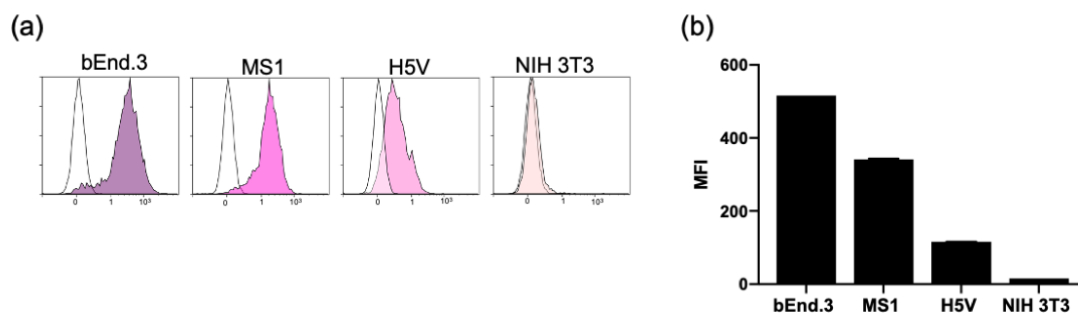

**Figure S1.** VEGFR2 expression in the murine cell line measured by flow cytometry. **(a)** Fluorescence of VEGFR2 detected by anti-VEGFR2-PE antibody correlates with the level of VEGFR2 expression: bEnd.3 > MS1 > H5V > NIH 3T3. The murine cell lines were incubated with the antibody for 1 h at 37 °C followed by trypsinization and FACS analysis. **(b)** Mean fluorescent intensity (MFI) obtained from flow cytometry. Data shown as mean  $\pm$  SD.

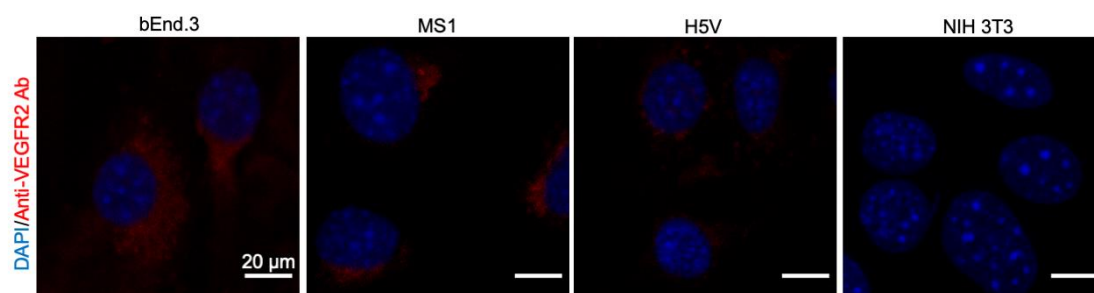

**Figure S2.** Microscopic images of VEGFR2 expression in the murine cell line. Fluorescence of VEGFR2 detected by anti-VEGFR2 antibody showed perinuclear VEGFR2 staining with varying intensities correlating with the level of VEGFR2, and no signal was observed in the NIH 3T3 cells.

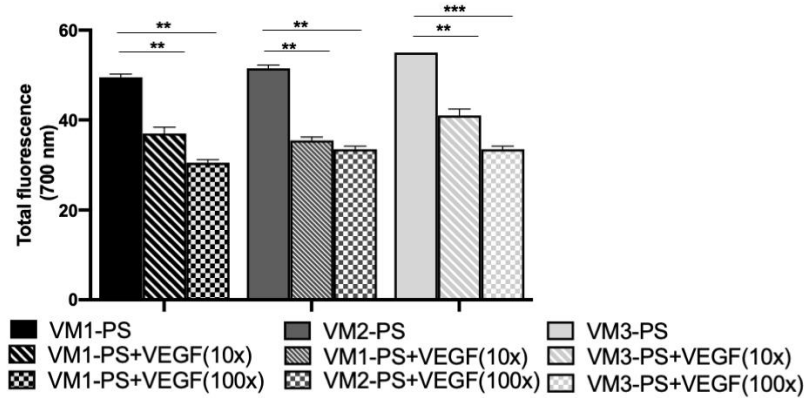

**Figure S3.** *In vitro* competition experiment of the NB-PS conjugates tested on purified protein in the presence or absence of 10x and 100x excess of VEGF. NB-PS conjugates alone (final concentration 25 nM) or in combination with VEGF (final concentrations 250 nM or 2.5  $\mu$ M) were added to the mVEGFR2 protein and incubated for 2 h at RT. After 3 times washing with PBS, total fluorescence intensity of the bound NB-PS conjugates was detected by an Odyssey infrared scanner at 700 nm (\*\*  $p < 0.01$ ; \*\*\*  $p < 0.001$ ; t test).

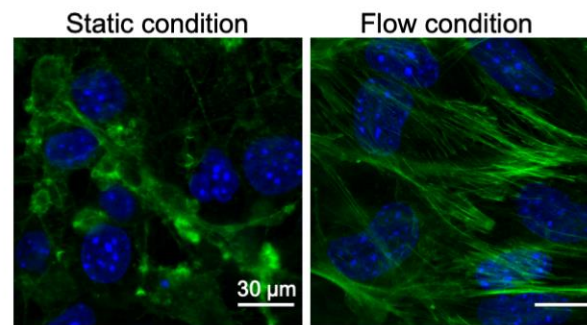

**Figure S4.** Comparison of F actin staining in non-treated bEnd.3 cells cultured under static or flow conditions. The F actin cytoskeleton staining shows a clear difference between the two conditions. A clear alignment of actin fibers is observed when cells were kept under flow.

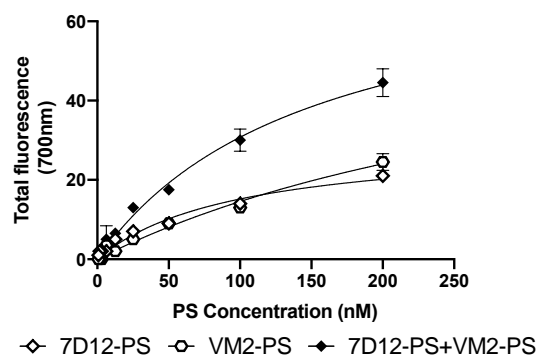

**Figure S5.** Association of the VEGFR2 and EGFR targeted nanobodies, separately and in combination, with cells of MS1/OSC co-cultures. After 1 h incubation of cells with the conjugates at 37  $^{\circ}$ C, total fluorescence intensity of the associated NB-PS conjugates was detected by an Odyssey infrared scanner at 700 nm.
