# Supplementary material for: Dual Targeting of Endothelial and Cancer Cells Potentiates In Vitro Nanobody-Targeted Photodynamic Therapy
Source: MDPI journal article supplement (doi:10.3390/cancers12102732), 2020-09-23

Figure 1a

Fluorescence scan before commassie stain

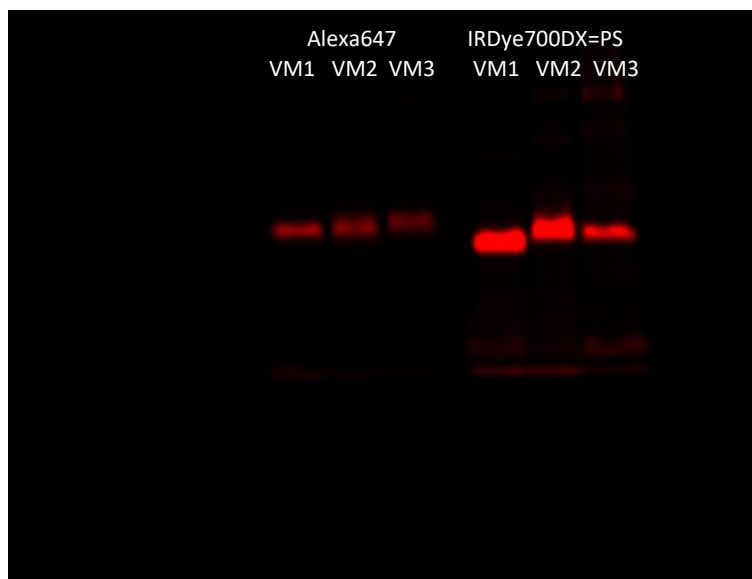

After coomassie stain

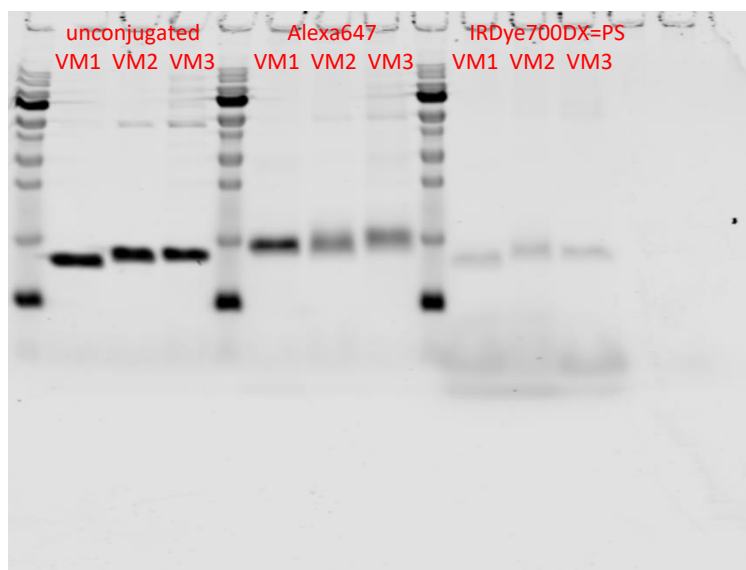

Figure 3a

Phospho VEGFR2

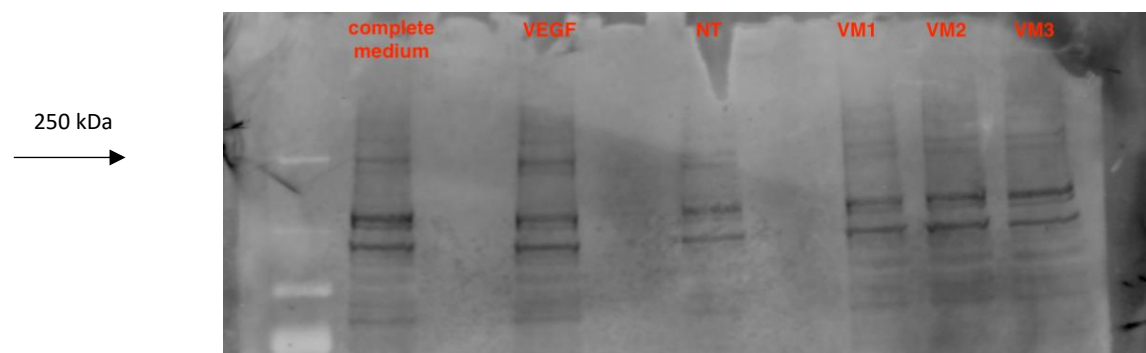

Total VEGFR2

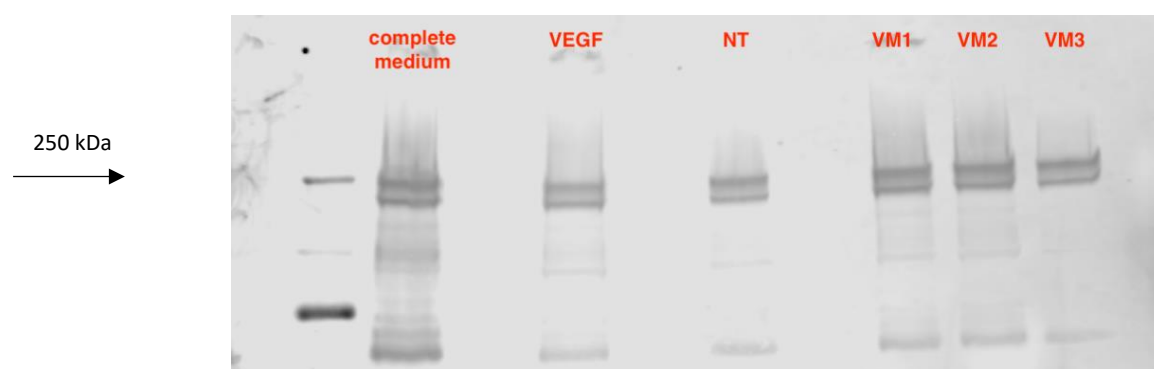

Actin

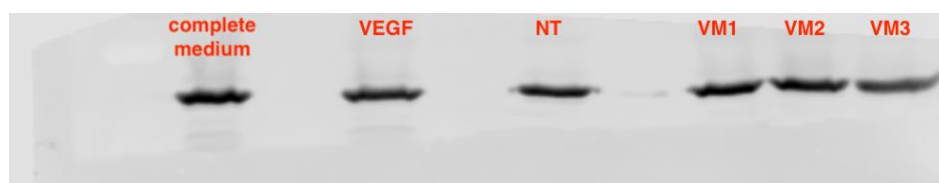

Supplement: s1 [file s1]
